# Supplementary material
Source: PubMed Central journal article supplement (PMC4744203)
Supplement: mmc1.pdf [file mmc1.pdf]

**Biophysical Journal**

**Supporting Material**

**Molecular Order of Arterial Collagen Using Circular Polarization  
Second-Harmonic Generation Imaging**

Raphaël Turcotte,<sup>1,2</sup> Jeffrey M. Mattson,<sup>3</sup> Juwell W. Wu,<sup>1</sup> Yanhang Zhang,<sup>2,3</sup> and  
Charles P. Lin<sup>1,\*</sup>

<sup>1</sup>Wellman Center for Photomedicine and Center for System Biology, Massachusetts General Hospital, Harvard Medical School, Boston, Massachusetts; and <sup>2</sup>Department of Biomedical Engineering and <sup>3</sup>Department of Mechanical Engineering, Boston University, Boston, Massachusetts

\*Correspondence: [lin@helix.mgh.harvard.edu](mailto:lin@helix.mgh.harvard.edu)

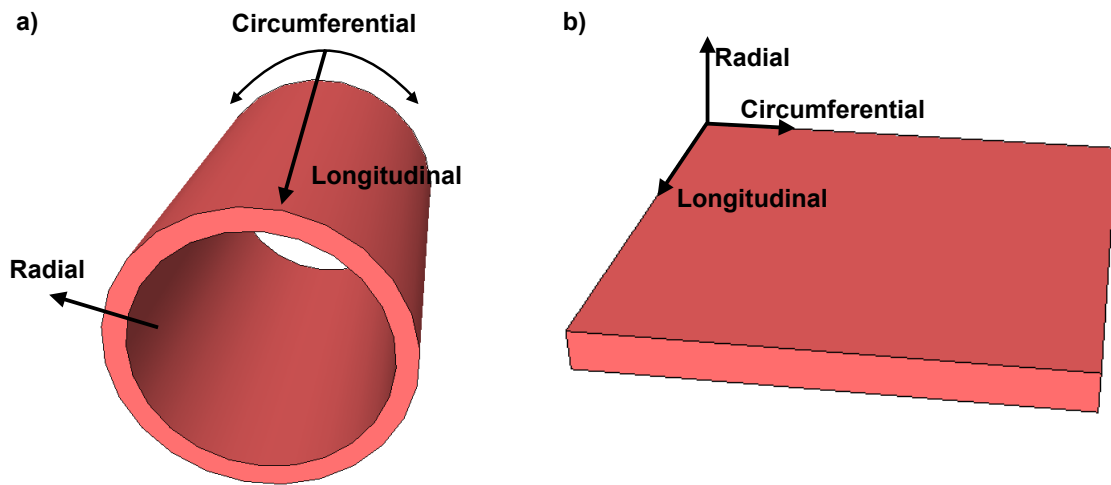

**Supporting Fig 1** Diagram showing axial, circumferential, and radial directions in a) intact and b) cut-open arteries. Arteries are cut-open along the longitudinal direction.

## Derivation of SHG Polarizability for collagen fibers

The general form of the second order polarizability is:<sup>1</sup>

$$\mathbf{P}_{\text{SHG}}^{(2)} = \epsilon_0 \chi^{(2)} \mathbf{E}, \quad (1)$$

where  $\chi^{(2)}$  is the third rank tensor for the second order nonlinear susceptibility

$$\chi^{(2)} = \begin{bmatrix} \chi_{xxx} & \chi_{xyy} & \chi_{xzz} & \chi_{xxy} & \chi_{xxz} & \chi_{xyx} & \chi_{xzx} & \chi_{xyz} & \chi_{xzy} \\ \chi_{yxx} & \chi_{yyy} & \chi_{yzz} & \chi_{yyx} & \chi_{yyz} & \chi_{yxy} & \chi_{yzy} & \chi_{yyz} & \chi_{yzy} \\ \chi_{zxx} & \chi_{zyy} & \chi_{zzz} & \chi_{zxy} & \chi_{zxx} & \chi_{zyx} & \chi_{zxx} & \chi_{zyz} & \chi_{zzy} \end{bmatrix}, \quad (2)$$

and  $\mathbf{E}$  is the general incident fields vector:

$$\mathbf{E} = \begin{bmatrix} E_x(\omega)E_x(\omega) \\ E_y(\omega)E_y(\omega) \\ E_z(\omega)E_z(\omega) \\ E_x(\omega)E_y(\omega) \\ E_x(\omega)E_z(\omega) \\ E_y(\omega)E_x(\omega) \\ E_z(\omega)E_x(\omega) \\ E_y(\omega)E_z(\omega) \\ E_z(\omega)E_y(\omega) \end{bmatrix}. \quad (3)$$

With  $c$  being a proportionality constant, the second-order polarizability is linked to the intensity

by:

$$I = c[P_x^{(2)}P_x^{(2)*} + P_y^{(2)}P_y^{(2)*} + P_z^{(2)}P_z^{(2)*}], \quad (4)$$

Several symmetry arguments can be made to simplified the  $\chi^{(2)}$  tensor. These arguments depend on the properties of the nonlinear process, but also on sample. For SHG in collagen fibers, hexagonal symmetry applies and the only non-zero elements are  $d_{33}$ ,  $d_{31}$ ,  $d_{15}$ , and  $d_{14}$ .<sup>1</sup>  $d_{is}$  is defined as  $\chi_{ijk}$  with  $i, j, k = \{x, y, z\}$  and  $s = 1, 2, 3, 4, 5, 6$  for  $xx, yy, zz, \{yz, zy\}, \{xz, zx\}$ , and  $\{xy, yx\}$  respectively. Eq. (2) can thus be written as:

$$\chi^{(2)} = \begin{bmatrix} 0 & 0 & 0 & 0 & a & 0 & a & b & b \\ 0 & 0 & 0 & 0 & -b & 0 & -b & a & a \\ m & m & n & 0 & 0 & 0 & 0 & 0 & 0 \end{bmatrix}, \quad (5)$$

where  $a = d_{15}$ ,  $b = d_{14}$ ,  $m = d_{31}$ , and  $n = d_{33}$ .

Cylindrical symmetry is also often considered.<sup>2</sup> Assuming cylindrical symmetry ( $b = 0$  and  $a = m$ ) is equivalent to assuming Kleinman symmetry. The experimental  $a/m$  ratio is not exactly 1 and both terms are usually kept.<sup>3</sup> This allows to express Eq. (5) as:

$$\chi^{(2)} = \begin{bmatrix} 0 & 0 & 0 & 0 & a & 0 & a & 0 & 0 \\ 0 & 0 & 0 & 0 & 0 & 0 & 0 & a & a \\ m & m & n & 0 & 0 & 0 & 0 & 0 & 0 \end{bmatrix}. \quad (6)$$

Assuming y-axis propagation of excitation fields ( $E_y = 0$ ), Eq. (1) can be written as:

$$\begin{bmatrix} P_x^{(2)}(2\omega) \\ P_y^{(2)}(2\omega) \\ P_z^{(2)}(2\omega) \end{bmatrix} = \epsilon_0 \begin{bmatrix} 0 & 0 & 0 & 0 & a & 0 & a & 0 & 0 \\ 0 & 0 & 0 & 0 & 0 & 0 & 0 & a & a \\ m & m & n & 0 & 0 & 0 & 0 & 0 & 0 \end{bmatrix} \begin{bmatrix} E_x(\omega)E_x(\omega) \\ 0 \\ E_z(\omega)E_z(\omega) \\ 0 \\ E_x(\omega)E_z(\omega) \\ 0 \\ E_z(\omega)E_x(\omega) \\ 0 \\ 0 \end{bmatrix}, \quad \text{or} \quad (7)$$

$$\begin{bmatrix} P_x^{(2)}(2\omega) \\ P_y^{(2)}(2\omega) \\ P_z^{(2)}(2\omega) \end{bmatrix} = \epsilon_0 \begin{bmatrix} \chi_{xzx}E_x(\omega)E_z(\omega) + \chi_{xxz}E_z(\omega)E_x(\omega) \\ 0 \\ \chi_{zxx}E_x(\omega)E_x(\omega) + \chi_{zzz}E_z(\omega)E_z(\omega) \end{bmatrix}. \quad (8)$$

Eq. (8) is valid only when hexagonal and cylindrical symmetries apply and can be used for any incident polarization state.

## Intensity for linearly polarized light

The electric field for linearly polarization light can be expressed in terms of the Jones vector:

$$\mathbf{E} = |\mathbf{E}| \text{Re}\{|\psi\rangle \exp[i(ky)]\}, \text{ where} \quad (9)$$

$$|\psi\rangle = \begin{bmatrix} \cos(\theta) \\ \sin(\theta) \end{bmatrix} \exp[i\alpha]. \quad (10)$$

The electric field can therefore be decomposed as  $E_z(\omega) = |E(\omega)|\cos(\theta)$  and  $E_x(\omega) = |E(\omega)|\sin(\theta)$ .

For linearly polarized light, Eq. (8) can thus be expressed as:

$$\begin{bmatrix} P_x^{(2)}(2\omega) \\ P_y^{(2)}(2\omega) \\ P_z^{(2)}(2\omega) \end{bmatrix} = \epsilon_0 \begin{bmatrix} \chi_{xzx}|E(\omega)||E(\omega)|\sin(\theta)\cos(\theta) + \chi_{xxz}|E(\omega)||E(\omega)|\sin(\theta)\cos(\theta) \\ 0 \\ \chi_{zxx}|E(\omega)||E(\omega)|\sin(\theta)\sin(\theta) + \chi_{zzz}|E(\omega)||E(\omega)|\cos(\theta)\cos(\theta) \end{bmatrix}, \quad (11)$$

$$\begin{bmatrix} P_x^{(2)}(2\omega) \\ P_y^{(2)}(2\omega) \\ P_z^{(2)}(2\omega) \end{bmatrix} = \epsilon_0 |E(\omega)|^2 \begin{bmatrix} 2\chi_{xzx}\sin(\theta)\cos(\theta) \\ 0 \\ \chi_{zxx}\sin^2(\theta) + \chi_{zzz}\cos^2(\theta) \end{bmatrix}, \text{ or} \quad (12)$$

$$\begin{bmatrix} P_x^{(2)}(2\omega) \\ P_y^{(2)}(2\omega) \\ P_z^{(2)}(2\omega) \end{bmatrix} = \epsilon_0 |E(\omega)|^2 \begin{bmatrix} \chi_{xzx}\sin(2\theta) \\ 0 \\ \chi_{zxx}\sin^2(\theta) + \chi_{zzz}\cos^2(\theta) \end{bmatrix}. \quad (13)$$

Using Eq. (13) in Eq. (4), we obtain the commonly used expression for the SHG intensity in polarimetric measurements:<sup>3</sup>

$$I_{SHG}^{Lin}(2\omega, \theta) = c\epsilon_0^2 |E(\omega)|^4 [(\chi_{xzx}\sin(2\theta))^2 + (\chi_{zxx}\sin^2(\theta) + \chi_{zzz}\cos^2(\theta))^2]. \quad (14)$$

A standard notation for Eq. (14) uses  $\rho_1 = \chi_{zzz}/\chi_{zxx}$  and  $\rho_2 = \chi_{xzx}/\chi_{zxx}$ .<sup>3</sup>

$$I_{SHG}^{Lin}(2\omega, \theta) = c\epsilon_0^2 \chi_{zxx}^2 |E(\omega)|^4 [(\rho_2 \sin(2\theta))^2 + (\sin^2(\theta) + \rho_1 \cos^2(\theta))^2]. \quad (15)$$

### Intensity for circularly polarized light

The linear polarization dependence has been presented on multiple occasions.<sup>2</sup> Here, we also introduce the equivalent expression for circularly polarized incident light. The electric field for circularly polarization light can be expressed in terms of the Jones vector:

$$\mathbf{E} = |\mathbf{E}| \text{Re}\{|\psi\rangle \exp[i(ky)]\}, \text{ where} \quad (16)$$

$$|\psi\rangle = \frac{1}{\sqrt{2}} \begin{bmatrix} 1 \\ \pm i \end{bmatrix} \exp[i\alpha]. \quad (17)$$

The electric field can therefore be decomposed as  $E_z(\omega) = \frac{1}{\sqrt{2}}|E(\omega)|$  and  $E_x(\omega) = \frac{\pm i}{\sqrt{2}}|E(\omega)|$ .

For circularly polarized light, Eq. (8) can thus be expressed as:

$$\begin{bmatrix} P_x^{(2)}(2\omega) \\ P_y^{(2)}(2\omega) \\ P_z^{(2)}(2\omega) \end{bmatrix} = \epsilon_0 \begin{bmatrix} \frac{\pm i}{2}\chi_{xxx}|E(\omega)||E(\omega)| + \frac{\pm i}{2}\chi_{xxz}|E(\omega)||E(\omega)| \\ 0 \\ -\frac{1}{2}\chi_{xxx}|E(\omega)||E(\omega)| + \frac{1}{2}\chi_{zzz}|E(\omega)||E(\omega)| \end{bmatrix}, \text{ or} \quad (18)$$

$$\begin{bmatrix} P_x^{(2)}(2\omega) \\ P_y^{(2)}(2\omega) \\ P_z^{(2)}(2\omega) \end{bmatrix} = \frac{\epsilon_0}{2}|E(\omega)|^2 \begin{bmatrix} \pm i 2\chi_{xxx} \\ 0 \\ \chi_{zzz} - \chi_{xxx} \end{bmatrix}. \quad (19)$$

Using Eq. (19) in Eq. (4), we obtain an expression for the SHG intensity with circularly polarized incident light.

$$I_{SHG}^{Cir}(2\omega) = c \frac{\epsilon_0^2}{4} |E(\omega)|^4 [(4\chi_{xxx}^2 + (\chi_{zzz} - \chi_{xxx})^2)]. \quad (20)$$

Using the same notation as in Eq. (15), Eq. (20) can be written as:

$$I_{SHG}^{Cir}(2\omega) = c \frac{\epsilon_0^2}{4} \chi_{xxx}^2 |E(\omega)|^4 [(4\rho_2^2 + (\rho_1 - 1)^2)]. \quad (21)$$

## References

- 1 Butcher, P.N., and D. Cotter. 1990. *The Elements of Nonlinear Optics*. Cambridge University Press, London.
- 2 Plotnikov, S.V., A.C. Millard, ..., W.A. Mohler. 2006. Characterization of the myosin-based source for second-harmonic generation from muscle sarcomeres. *Biophys. J.* 90(2), 693–703.
- 3 Chen, W.L., T.H. Li, ..., C.Y. Dong. 2009. Second harmonic generation  $\chi$  tensor microscopy for tissue imaging. *Appl. Phys. Lett.* 94(18), 2007–2010.
- Gusachenko, I., G. Latour, ..., M.-C. Schannes-Klein. 2010. Polarization-resolved Second Harmonic microscopy in anisotropic thick tissues. *Opt. Express* 18(18), 19339–19352.
